# Supplementary material
Source: PubMed Central journal article supplement (PMC9826743)
Supplement: NIHMS1856490-supplement-Supplementary.pdf [file NIHMS1856490-supplement-Supplementary.pdf]

Anti-Drug Antibody Formation Against Biologic Agents in Inflammatory Bowel Disease: A  
Systematic Review and Meta-analysis.

Short Title: Anti-Drug Antibody Formation in IBD

**Authors:**

Steven J. Bots, Claire E. Parker, Johannan F. Brandse, Mark Löwenberg, Brian G. Feagan,  
William J. Sandborn, Vipul Jairath, Geert D'Haens, Niels Vande Casteele.

**Biodrugs 2021**

**Supplementary Appendix 1: Search strategies**

MEDLINE (OVID; 1946-present)

1. random\$.tw.
2. factorial\$.tw.
3. (crossover\$ or cross over\$ or cross-over\$).tw.
4. placebo\$.tw.
5. single blind.mp.
6. double blind.mp.
7. triple blind.mp.
8. (singl\$ adj blind\$).tw.
9. (double\$ adj blind\$).tw.
10. (tripl\$ adj blind\$).tw.
11. assign\$.tw.
12. allocat\$.tw.
13. crossover procedure/
14. double blind procedure/
15. single blind procedure/
16. triple blind procedure/
17. randomized controlled trial/
18. or/1-17
19. (exp animal/ or animal.hw. or nonhuman/) not (exp human/ or human cell/ or (human or humans).ti.)
20. 18 not 19

21. exp Crohn disease/ or crohn\*.mp.
22. (colitis and ulcerat\*).mp.
23. ulcerative colitis.mp. or exp ulcerative colitis/
24. inflammatory bowel disease\*.mp.
25. IBD.mp.
26. 21 or 22 or 23 or 24 or 25
27. 20 and 26
28. exp monoclonal antibody/
29. anti-tum\*.mp. or exp anti tumor necrosis factor/
30. exp tumor necrosis factor antibody/ or exp tumor necrosis factor alpha antibody/ or anti-TNF.mp. or anti TNF.mp.
31. anti-alpha.mp.
32. infliximab.mp. or exp infliximab/ or cA2.mp.
33. ustekinumab.mp. or CNTO 1275.mp. or exp ustekinumab/
34. exp certolizumab pegol/ or certolizumab\*.mp. or CDP870.mp.
35. natalizumab.mp. or exp natalizumab/ or alpha-4.mp. or alpha4.mp.
36. vedolizumab.mp. or exp vedolizumab/ or alpha4beta7.mp or alpha-4beta-7.mp or MLN02.mp or MLN-02.mp.
37. adalimumab.mp. or exp adalimumab/
38. exp golimumab/ or golimumab.mp. or CNTO\*148.mp.
39. exp mucosal addressin cell adhesion molecule 1/ or anti-madcam.mp.
40. etrolizumab.mp. or rhuMAb Beta7.mp. or exp etrolizumab/
41. 28 or 29 or 30 or 31 or 32 or 33 or 34 or 35 or 36 or 37 or 38 or 39 or 40
42. 27 and 41

EMBASE (Ovid; 1947-present)

1. random\$.tw.
2. factorial\$.tw.
3. (crossover\$ or cross over\$ or cross-over\$).tw.

4. placebo\$.tw.
5. single blind.mp.
6. double blind.mp.
7. triple blind.mp.
8. (singl\$ adj blind\$).tw.
9. (double\$ adj blind\$).tw.
10. (tripl\$ adj blind\$).tw.
11. assign\$.tw.
12. allocat\$.tw.
13. crossover procedure/
14. double blind procedure/
15. single blind procedure/
16. triple blind procedure/
17. randomized controlled trial/
18. or/1-17
19. (exp animal/ or animal.hw. or nonhuman/) not (exp human/ or human cell/ or (human or humans).ti.)
20. 18 not 19
21. exp Crohn disease/ or crohn\*.mp.
22. (colitis and ulcerat\*).mp.
23. ulcerative colitis.mp. or exp ulcerative colitis/
24. inflammatory bowel disease\*.mp.
25. IBD.mp.
26. 21 or 22 or 23 or 24 or 25
27. 20 and 26
28. exp monoclonal antibody/
29. anti-tum\*.mp. or exp anti tumor necrosis factor/
30. exp tumor necrosis factor antibody/ or exp tumor necrosis factor alpha antibody/ or anti-TNF.mp. or anti TNF.mp.
31. anti-alpha.mp.

32. infliximab.mp. or exp infliximab/ or cA2.mp.
33. ustekinumab.mp. or CNTO 1275.mp. or exp ustekinumab/
34. exp certolizumab pegol/ or certolizumab\*.mp. or CDP870.mp.
35. natalizumab.mp. or exp natalizumab/ or alpha-4.mp. or alpha4.mp.
36. vedolizumab.mp. or exp vedolizumab/ or alpha4beta7.mp or alpha-4beta-7.mp or MLN02.mp or MLN-02.mp.
37. adalimumab.mp. or exp adalimumab/
38. exp golimumab/ or golimumab.mp. or CNTO\*148.mp.
39. exp mucosal addressin cell adhesion molecule 1/ or anti-madcam.mp.
40. etrolizumab.mp. or rhuMAb Beta7.mp. or exp etrolizumab/
41. 28 or 29 or 30 or 31 or 32 or 33 or 34 or 35 or 36 or 37 or 38 or 39 or 40
42. 27 and 41

#### COCHRANE LIBRARY

1. Crohn
2. Colitis
3. Inflammatory bowel disease
4. IBD
5. monoclonal antibody
6. anti-tum\* or anti tumor necrosis factor or tumor necrosis factor antibody or tumor necrosis factor alpha antibody or anti-TNF or anti TNF or anti-alpha
7. infliximab or cA2
8. ustekinumab or CNTO 1275
9. certolizumab or CDP870
10. natalizumab or alpha-4or alpha4
11. vedolizumab or alpha4beta7 or alpha-4beta-7 or MLN02 or MLN-02.
12. Adalimumab
13. Golimumab or CNTO148
14. mucosal addressin cell adhesion molecule 1 or anti-madcam

15. etrolizumab

16. #1 or #2 or #3 or #4

17. #5 or #6 or #7 or #8 or #9 or #10 or #11 or #12 or #13 or #14 or #15

18. #16 and #17

#### Cochrane IBD/FBD Group Register

anti-tum\* or anti tumor necrosis factor or tumor necrosis factor antibody or tumor necrosis factor alpha antibody or anti-TNF or anti TNF or anti-alpha or infliximab or cA2 or ustekinumab or CNTO 1275 natalizumab or alpha-4or alpha4 or vedolizumab or alpha4beta7 or alpha-4beta-7 or MLN02 or MLN-02 or adalimumab or golimumab or CNTO148 or mucosal addressin cell adhesion molecule 1 or anti-madcam or etrolizumab

**Supplementary Table 1:** Characteristics of included studies

| INFLIXIMAB |                                                                                                                                  |     |             |            |               |               |                                           |                                                |                                                         |
|------------|----------------------------------------------------------------------------------------------------------------------------------|-----|-------------|------------|---------------|---------------|-------------------------------------------|------------------------------------------------|---------------------------------------------------------|
|            | Study & records                                                                                                                  | N   | Sample size | Population | Study type    | Data type     | Intervention/<br>Population               | Control                                        | Outcomes of interest                                    |
| 1          | Baert 2003 <sup>1</sup>                                                                                                          | 125 | 125         | CD         | Observational | Observational | Infliximab + IM                           | Infliximab                                     | -ADA formation<br>-ADA concentration<br>-Adverse events |
| 2          | Colombel 2010 <sup>2</sup><br>(SONIC)<br>Records:<br>-Colombel 2017 <sup>3</sup>                                                 | 508 | 219         | CD         | RCT           | Randomized    | Infliximab + azathioprine                 | Azathioprine + placebo<br>Infliximab + placebo | -ADA formation<br>-Clinical outcomes                    |
|            |                                                                                                                                  |     |             |            |               |               | ADA positive                              | ADA negative or inconclusive                   |                                                         |
| 3          | D'Haens 2018 <sup>4</sup>                                                                                                        | 122 | 122         | CD         | RCT           | Observational | Dose intensification algorithm            | Dose intensification based on symptoms         | -ADA formation                                          |
| 4          | Farrell 2003 <sup>5</sup>                                                                                                        | 53  | 53          | CD         | Observational | Observational | Infliximab ADA positive                   | Infliximab ADA negative                        | -ADA formation<br>-Clinical outcomes                    |
| 5          | Farrel 2003 <sup>5</sup>                                                                                                         | 80  | 68          |            | RCT           | Randomized    | Infliximab + hydrocortisone premedication | Infliximab                                     | -ADA formation<br>-ADA concentration<br>-Adverse events |
| 6          | Feagan 2014 <sup>6</sup>                                                                                                         | 126 | 126         | CD         | RCT           | Randomized    | Infliximab + methotrexate                 | Infliximab + placebo                           | -ADA formation<br>-Clinical outcomes                    |
| 7          | Fernandes 2020 <sup>7</sup>                                                                                                      | 205 |             |            | Observational | Observational | Treatment escalation based on TDM         | Retrospective cohort without TDM               | -ADA formation                                          |
|            |                                                                                                                                  |     |             |            |               |               | Infliximab + IM                           | Infliximab                                     | -ADA formation                                          |
| 8          | Hanauer 2002 <sup>8</sup><br>(ACCENT-1 <sup>‡</sup> )<br>Records:<br>-Rutgeerts 2004 <sup>9</sup><br>-Hanauer 2004 <sup>10</sup> | 573 | 442         | CD         | RCT           | Observational | Infliximab + IM                           | Infliximab                                     | -ADA formation<br>-Adverse events                       |
|            |                                                                                                                                  |     |             |            |               |               | ADA positive                              | ADA negative or inconclusive                   |                                                         |
| 9          | Jiang 2015 <sup>11</sup>                                                                                                         | 123 | 78          | UC         | RCT           | Observational | ADA positive                              | ADA negative or inconclusive                   | -Clinical outcomes                                      |

|      |                                                                                                                                                           |     |     |     |                  |               |                                                                              |                                                |                                                              |
|------|-----------------------------------------------------------------------------------------------------------------------------------------------------------|-----|-----|-----|------------------|---------------|------------------------------------------------------------------------------|------------------------------------------------|--------------------------------------------------------------|
| 10   | Oh 2017 <sup>12</sup>                                                                                                                                     | 138 | 138 | CD  | Observational    | Observational | IFX ADA positive                                                             | IFX ADA negative                               | -Drug concentration                                          |
|      |                                                                                                                                                           |     |     |     |                  |               | IFX + IM                                                                     | IM                                             | -ADA formation                                               |
|      |                                                                                                                                                           |     |     |     |                  |               | Clinical response                                                            | No response                                    | -ADA concentration                                           |
| 11   | Panaccione 2014 <sup>13</sup>                                                                                                                             | 239 | 68  | UC  | RCT              | Randomized    | Infliximab + azathioprine                                                    | Infliximab + placebo<br>Azathioprine + placebo | -ADA formation                                               |
| 12   | Present 1999 <sup>14</sup>                                                                                                                                | 94  | 92  | CD  | RCT              | Observational | Infliximab                                                                   | placebo                                        | -ADA formation                                               |
| 13   | Regueiro 2016 <sup>15</sup>                                                                                                                               | 297 | 147 | CD* | RCT              | Observational | Infliximab + IM                                                              | Infliximab                                     | -ADA formation                                               |
|      |                                                                                                                                                           |     |     |     |                  |               | ADA positive                                                                 | ADA negative or inconclusive                   | -Endoscopic outcomes                                         |
| 14   | Roblin 2017 <sup>16</sup>                                                                                                                                 | 81  | 81  | IBD | Open label trial | Observational | Infliximab + continued azathioprine<br><br>Infliximab + lowered azathioprine | Infliximab + placebo                           | -ADA formation                                               |
| 15   | Rutgeerts 1999 <sup>17</sup>                                                                                                                              | 73  | 47  | CD  | RCT              | Observational | Infliximab                                                                   | Placebo                                        | -ADA formation                                               |
| 16.1 | Rutgeerts 2005a <sup>18</sup><br>(ACT-1)<br>Records:<br>-Reinisch 2012 <sup>19</sup><br>-Adedokun 2014 <sup>20</sup><br>-Vande Castele 2019 <sup>21</sup> | 364 | 229 | UC  | RCT              | Observational | ADA positive                                                                 | ADA negative or inconclusive                   | -Clinical outcomes<br>-Drug concentration<br>-Adverse events |
| 16.2 | Rutgeerts 2005b <sup>18</sup><br>(ACT-2)<br>Records:<br>-Reinisch 2012 <sup>19</sup><br>-Adedokun 2014 <sup>20</sup><br>-Vande Castele 2019 <sup>21</sup> | 364 | 188 | UC  | RCT              | Observational | ADA positive                                                                 | ADA negative or inconclusive                   | -Clinical outcomes<br>-Drug concentration<br>-Adverse events |
| 17   | Sands 2004 <sup>22</sup>                                                                                                                                  | 306 | 258 | CD  | RCT              | Observational | Infliximab + IM<br>Infliximab + CS                                           | Infliximab                                     | -ADA formation<br>-Adverse events                            |

|                   |                                                                                                                                            |          |                      |                   |                   |                            |                                          |                                                   |                                           |
|-------------------|--------------------------------------------------------------------------------------------------------------------------------------------|----------|----------------------|-------------------|-------------------|----------------------------|------------------------------------------|---------------------------------------------------|-------------------------------------------|
|                   |                                                                                                                                            |          |                      |                   |                   |                            | Infliximab + IM + CS                     |                                                   |                                           |
|                   |                                                                                                                                            |          |                      |                   |                   |                            | ADA positive                             | ADA negative or inconclusive                      |                                           |
| 18                | Seow 2010 <sup>23</sup>                                                                                                                    | 115      | 108                  | UC                | Observational     | Observational              | ADA positive                             | ADA negative                                      | -Clinical outcomes<br>-Drug concentration |
| 19                | Steenholdt 2014 <sup>24</sup><br><i>Records:</i><br>-Steenholdt 2015 <sup>25</sup><br>-Edlund 2017 <sup>26</sup>                           | 69       | 69                   | CD                | RCT               | Observational              | Infliximab intensification based on ADAs | Infliximab intensification based on algorithm     | -ADA formation                            |
| 20                | Targan 1997 <sup>27</sup>                                                                                                                  | 108      | 101                  | CD                | RCT               | Observational              | Infliximab                               | Placebo                                           | -ADA formation                            |
| 21                | Van Assche 2008 <sup>28</sup>                                                                                                              | 80       | 80                   | CD                | RCT               | Randomized                 | Infliximab + azathioprine                | Infliximab + placebo (withdrawal of azathioprine) | -ADA formation                            |
| 22                | Vande Casteele 2015 <sup>29</sup><br><i>TAXIT</i><br><i>Records:</i><br>-van Stappen 2017 <sup>30</sup><br>-van Stappen 2018 <sup>31</sup> | 263      | 275                  | IBD               | RCT               | Observational              | Infliximab intensification based on ADAs | Infliximab intensification based on symptoms      | -ADA formation                            |
|                   |                                                                                                                                            |          | 76                   |                   |                   |                            | ADA positive                             | ADA negative or inconclusive                      | -Drug concentration                       |
|                   |                                                                                                                                            |          | Drug sensitive assay |                   |                   |                            | Drug tolerant assay                      | -ADA formation<br>-Clinical relevance             |                                           |
| 23                | Vermeire 2007 <sup>32</sup>                                                                                                                | 174      | 174                  | CD                | Observational     | Observational              | Infliximab + methotrexate                | Infliximab + placebo                              | -ADA formation<br>-ADA concentration      |
|                   |                                                                                                                                            |          |                      |                   |                   |                            | Infliximab + azathioprine                |                                                   |                                           |
|                   |                                                                                                                                            |          |                      |                   |                   |                            | ADA positive                             |                                                   | ADA negative or inconclusive              |
| 24                | Ye 2019 <sup>33</sup>                                                                                                                      | 220      |                      | CD                | RCT               | Observational              | Biosimilar IFX                           | Originator IFX                                    | -ADA formation                            |
| 25                | Yokoyama 2017 <sup>34</sup>                                                                                                                | 21       | 21                   | UC                | Observational     | Observational              | LOR                                      | No LOR                                            | -ADA formation                            |
| <b>ADALIMUMAB</b> |                                                                                                                                            |          |                      |                   |                   |                            |                                          |                                                   |                                           |
| 26                | <b>Study</b>                                                                                                                               | <b>N</b> | <b>Sample size</b>   | <b>Population</b> | <b>Study type</b> | <b>Data type</b>           | <b>Intervention/ Population</b>          | <b>Control</b>                                    | <b>Outcomes of interest</b>               |
| 27                | Bodini 2014 <sup>35</sup><br><i>Records:</i><br>-Savarino 2013 <sup>36</sup>                                                               | 6        | 6                    | CD*               | RCT               | Observational <sup>†</sup> | Adalimumab                               | Azathioprine<br>Mesalamine                        | -ADA formation                            |



|                                  |                                                                                                                  |          |                        |                   |                   |                  |                                     |                         |                                      |
|----------------------------------|------------------------------------------------------------------------------------------------------------------|----------|------------------------|-------------------|-------------------|------------------|-------------------------------------|-------------------------|--------------------------------------|
| 28                               | Hanauer 2006 <sup>37</sup><br>(CLASSIC-I)                                                                        | 299      | 225                    | CD                | RCT               | Observational    | Adalimumab                          | Placebo                 | -ADA formation                       |
| 29                               | Matusumoto 2016 <sup>38</sup><br>Records:<br>-Motoya 2017 <sup>39</sup><br>-Nakase 2017 <sup>40</sup>            | 176      | 151                    | CD                | RCT               | Randomized       | Adalimumab +<br>azathioprine        | Adalimumab +<br>placebo | -ADA formation                       |
| 30                               | Sandborn 2007a <sup>41</sup><br>(CLASSIC II)                                                                     | 276      | 269                    | CD                | RCT               | Observational    | Adalimumab +<br>IM                  | Adalimumab              | -ADA formation                       |
| 31                               | Sandborn 2007b <sup>42</sup><br>(CLASSIC I)                                                                      | 325      | 158                    | CD                | RCT               | Observational    | Adalimumab +<br>IM                  | Adalimumab              | -ADA formation                       |
| 32                               | Sandborn 2012a <sup>43</sup><br>ULTRA II<br>Records:<br>-Awni 2013 <sup>44</sup><br>-Sandborn 2013 <sup>45</sup> | 518      | 245                    | UC                | RCT               | Observational    | Adalimumab                          | Placebo                 | -ADA formation                       |
| 33                               | Suzuki 2014 <sup>46</sup><br>Records:<br>-Suzuki 2017 <sup>47</sup>                                              | 274      | 240                    | UC                | RCT               | Observational    | Adalimumab                          | Placebo                 | -ADA formation                       |
| 34                               | Watanabe 2012 <sup>48</sup><br>Records:<br>-Watanabe 2014 <sup>49</sup>                                          | 90       | 67                     | CD                | RCT               | Observational    | Adalimumab +<br>IM                  | Adalimumab              | -ADA formation                       |
| 35                               | Wright 2018 <sup>50</sup>                                                                                        | 52       | 52                     | CD                | RCT subanalysis   | Observational    | Adalimumab +<br>IM                  | Adalimumab              | -ADA formation                       |
|                                  |                                                                                                                  |          |                        |                   |                   |                  | ADA positive                        | ADA negative            | -Adalimumab<br>concentration         |
| 36                               | Wu 2016 <sup>51</sup>                                                                                            | 30       | 30                     | CD                | RCT               | Observational    | Adalimumab                          | Placebo                 | -ADA formation                       |
| <b>INFLIXIMAB and ADALIMUMAB</b> |                                                                                                                  |          |                        |                   |                   |                  |                                     |                         |                                      |
|                                  | <b>Study</b>                                                                                                     | <b>N</b> | <b>Sample<br/>size</b> | <b>Population</b> | <b>Study type</b> | <b>Data type</b> | <b>Intervention/<br/>Population</b> | <b>Control</b>          | <b>Outcomes of interest</b>          |
| 37                               | Roblin 2020 <sup>52</sup>                                                                                        | 90       | 90                     | IBD               | RCT               | Observational    | Anti-TNF + IM                       | Anti-TNF                | -ADA formation<br>-ADA disappearance |
| <b>GOLIMUMAB</b>                 |                                                                                                                  |          |                        |                   |                   |                  |                                     |                         |                                      |
| 38                               | Hibi 2017 <sup>53</sup><br>(PURSUIT-J)                                                                           | 123      | 123                    | UC                | RCT               | Observational    | Golimumab                           | Placebo                 | -ADA formation                       |
| 39                               | Rutgeerts 2015 <sup>54</sup><br>(PURSUIT-IV)                                                                     | 291      | 206                    | UC                | RCT               | Observational    | Golimumab i.v.                      | Placebo                 | -ADA formation                       |

|    |                                                                                                                                                                                                                                |      |      |    |     |               |                |           |                |
|----|--------------------------------------------------------------------------------------------------------------------------------------------------------------------------------------------------------------------------------|------|------|----|-----|---------------|----------------|-----------|----------------|
| 40 | Sandborn 2014 <sup>55, 56</sup><br><i>Records:</i><br>-Adedokun 2013<br>(2x) <sup>57, 58</sup><br>-Adedokun 2017 <sup>59</sup><br>-Sandborn 2017 <sup>60</sup><br>-Reinisch 2018 <sup>61</sup><br>-Adedokun 2019 <sup>62</sup> | 1528 | 1103 | UC | RCT | Observational | Golimumab + IM | Golimumab | -ADA formation |
|----|--------------------------------------------------------------------------------------------------------------------------------------------------------------------------------------------------------------------------------|------|------|----|-----|---------------|----------------|-----------|----------------|

**CERTOLIZUMAB PEGOL**

|    | <b>Study</b>                                                                                                                      | <b>N</b> | <b>Sample size</b> | <b>Population</b> | <b>Study type</b> | <b>Data type</b> | <b>Intervention/ Population</b>         | <b>Control</b>                                     | <b>Outcomes of interest</b>                                    |
|----|-----------------------------------------------------------------------------------------------------------------------------------|----------|--------------------|-------------------|-------------------|------------------|-----------------------------------------|----------------------------------------------------|----------------------------------------------------------------|
| 41 | Sandborn 2007c <sup>63</sup><br>PRECISE-1<br><i>Records:</i><br>-Sandborn 2015 <sup>64</sup>                                      | 662      | 331                | CD                | RCT               | Observational    | Certolizumab pegol + IM<br>ADA positive | Certolizumab pegol<br>ADA negative or inconclusive | -ADA formation<br>-Drug concentration                          |
| 42 | Sandborn 2010b <sup>65</sup><br>(PRECiSE 4)<br><i>Records:</i><br>-Sandborn 2015 <sup>64</sup><br>-Sandborn 2016 <sup>66</sup>    | 124      | 124                | CD                | RCT               | Observational    | Certolizumab pegol<br>ADA positive      | Placebo<br>ADA negative or inconclusive            | -ADA formation<br>-Drug concentration                          |
| 43 | Sandborn 2011 <sup>67</sup>                                                                                                       | 438      | 223                | CD                | RCT               | Observational    | Certolizumab pegol                      | Placebo                                            | -ADA formation                                                 |
| 44 | Sandborn 2017 <sup>68</sup><br>(PRECiSE-3)<br><i>Records:</i><br>-Lichtenstein 2010 <sup>69</sup><br>-Sandborn 2015 <sup>64</sup> | 595      | 595                | CD                | RCT               | Observational    | Certolizumab pegol + IM<br>ADA positive | Certolizumab pegol<br>ADA negative or inconclusive | -ADA formation<br>-Biochemical outcomes<br>-Drug concentration |
| 45 | Schreiber 2005 <sup>70</sup>                                                                                                      | 292      | 73                 | CD                | RCT               | Observational    | Certolizumab pegol                      | Placebo                                            | -ADA formation                                                 |
| 46 | Schreiber 2007 <sup>71</sup><br>PRECISE-2<br><i>Records:</i><br>-Sandborn 2015 <sup>64</sup>                                      | 668      | 668                | CD                | RCT               | Observational    | Certolizumab pegol + IM<br>ADA positive | Certolizumab pegol<br>ADA negative or inconclusive | -ADA formation<br>-Drug concentration<br>-Clinical outcomes    |

**VEDOLIZUMAB**

|    | <b>Study</b>              | <b>N</b> | <b>Sample size</b> | <b>Population</b> | <b>Study type</b> | <b>Data type</b> | <b>Intervention/ Population</b>  | <b>Control</b> | <b>Outcomes of interest</b> |
|----|---------------------------|----------|--------------------|-------------------|-------------------|------------------|----------------------------------|----------------|-----------------------------|
| 47 | Feagan 2005 <sup>72</sup> | 181      | 30                 | UC                | RCT               | Observational    | MLN02 (0.5 mg)<br>MLN02 (2.0 mg) | Placebo        | -ADA formation              |

|                    |                                                                                                                                                                                                                  |          |                     |                   |                   |                  |                                        |                              |                              |
|--------------------|------------------------------------------------------------------------------------------------------------------------------------------------------------------------------------------------------------------|----------|---------------------|-------------------|-------------------|------------------|----------------------------------------|------------------------------|------------------------------|
| 48                 | Feagan 2008 <sup>73</sup>                                                                                                                                                                                        | 185      | 128                 | CD                | RCT               | Observational    | MLN02 (0.5 mg)                         | Placebo                      | -ADA formation               |
|                    |                                                                                                                                                                                                                  |          |                     |                   |                   |                  | MLN02 (2.0 mg)                         | ADA positive                 | ADA negative or inconclusive |
| 49                 | Feagan 2013 <sup>74</sup><br>(GEMINI 1)<br><i>Records:</i><br>-Rosario 2015 <sup>75</sup><br>-Feagan 2015 <sup>76</sup><br>-Feagan 2017 <sup>77</sup><br>-Loftus 2017 <sup>78</sup><br>-Wyant 2019 <sup>79</sup> | 895      | 620                 | UC                | RCT               | Observational    | Vedolizumab                            | Placebo                      | -ADA formation               |
|                    |                                                                                                                                                                                                                  |          |                     |                   |                   |                  | ADA positive                           | ADA negative or inconclusive | -Adverse events              |
| 50                 | Motoya 2019 <sup>80</sup>                                                                                                                                                                                        | 292      | 167                 | UC                | RCT               | Observational    | Vedolizumab                            | Placebo                      | -ADA formation               |
| 51                 | Parikh 2012 <sup>81</sup><br><i>Records:</i><br>-Parikh 2013<br>(extension) <sup>82</sup>                                                                                                                        | 46       | 37                  | UC                | RCT               | Observational    | Vedolizumab                            | Placebo                      | -ADA formation               |
|                    |                                                                                                                                                                                                                  | 72       | 72                  |                   |                   |                  | ADA positive                           | ADA negative or inconclusive | -Adverse events              |
| 52                 | Sandborn 2013 <sup>83</sup><br><br><i>Records:</i><br>-Feagan 2015 <sup>76</sup><br>-Vermeire 2017 <sup>84</sup><br>-Wyant 2019 <sup>79</sup>                                                                    | 1115     | 814                 | CD                | RCT               | Observational    | Vedolizumab                            | Placebo                      | -ADA formation               |
| 53                 | Sandborn 2020 <sup>85</sup><br>(VISIBLE)<br><i>Records:</i><br>-Sandborn 2019 <sup>86</sup>                                                                                                                      | 383      | 106 s.c.<br>54 i.v. | UC                | RCT               | Observational    | Vedolizumab i.v.<br>+ s.c. maintenance | Placebo                      | -ADA formation               |
| 54                 | Sands 2014 <sup>87</sup>                                                                                                                                                                                         | 416      | 209                 | CD                | RCT               | Observational    | Vedolizumab                            | Placebo                      | -ADA formation               |
| 55                 | Watanabe 2020 <sup>88</sup>                                                                                                                                                                                      | 157      | 63                  | CD                | RCT               | Observational    | Vedolizumab                            | Placebo                      | -ADA formation               |
| <b>NATALIZUMAB</b> |                                                                                                                                                                                                                  |          |                     |                   |                   |                  |                                        |                              |                              |
|                    | <b>Study</b>                                                                                                                                                                                                     | <b>N</b> | <b>Sample size</b>  | <b>Population</b> | <b>Study type</b> | <b>Data type</b> | <b>Intervention/<br/>Population</b>    | <b>Control</b>               | <b>Outcomes of interest</b>  |
| 56                 | Ghosh 2003 <sup>89</sup>                                                                                                                                                                                         | 248      | 185                 | CD                | RCT               | Observational    | Natalizumab                            | Placebo                      | -ADA formation               |
| 57                 | Gordon 2001 <sup>90</sup>                                                                                                                                                                                        | 30       | 18                  | CD                | RCT               | Observational    | Natalizumab                            | Placebo                      | -ADA formation               |
| 58                 | Gordon 2002 <sup>91</sup>                                                                                                                                                                                        | 10       | 10                  | UC                | Open-label        | Observational    | Natalizumab                            | N/A                          | -ADA formation               |
| 59                 | Sandborn 2005a <sup>92</sup><br>(ENACT-1)                                                                                                                                                                        | 905      | 723                 | CD                | RCT               | Observational    | Natalizumab + IM                       | Natalizumab                  | -ADA formation               |
| 60                 | Sandborn 2005b <sup>92</sup><br>(ENACT-2)                                                                                                                                                                        | 339      | 214                 | CD                | RCT               | Observational    | Natalizumab + IM                       | Natalizumab                  | -ADA formation               |

|                    |                                                                                                                                                                                                                                                                                                                    |                          |                    |                   |                   |                  |                                 |                |                             |
|--------------------|--------------------------------------------------------------------------------------------------------------------------------------------------------------------------------------------------------------------------------------------------------------------------------------------------------------------|--------------------------|--------------------|-------------------|-------------------|------------------|---------------------------------|----------------|-----------------------------|
| 61                 | Targan 2007 <sup>93</sup>                                                                                                                                                                                                                                                                                          | 509                      | 241                | CD                | RCT               | Observational    | Natalizumab + IM                | Natalizumab    | -ADA formation              |
| 62                 | Sands 2007 <sup>94</sup>                                                                                                                                                                                                                                                                                           | 79                       | 52                 | CD                | RCT               | Observational    | Natalizumab                     | Placebo        | -ADA formation              |
| <b>USTEKINUMAB</b> |                                                                                                                                                                                                                                                                                                                    |                          |                    |                   |                   |                  |                                 |                |                             |
|                    | <b>Study</b>                                                                                                                                                                                                                                                                                                       | <b>N</b>                 | <b>Sample size</b> | <b>Population</b> | <b>Study type</b> | <b>Data type</b> | <b>Intervention/ Population</b> | <b>Control</b> | <b>Outcomes of interest</b> |
| 63                 | Sands 2019 <sup>95</sup><br>(UNIFI)<br><i>Records:</i><br>-Adedokun 2019 (2x) <sup>96, 97</sup>                                                                                                                                                                                                                    | 960                      | 680                | UC                | Post-Hoc RCT      | Observational    | Ustekinumab                     | Placebo        | -ADA formation              |
| 64                 | Feagan 2016 <sup>98</sup><br>(UNITI-1, UNITI-2, IM-UNITI)<br><i>Records:</i><br>-Hibi 2017 <sup>99</sup><br>-Sandborn 2016 <sup>100</sup><br>-Sandborn 2018 <sup>101</sup><br>-Sandborn 2019 (IM-UNITI) <sup>102</sup><br>-Ghosh 2019 (IM-UNITI LTE) <sup>103</sup><br>-Hanauer 2020 (IM-UNITI LTE) <sup>104</sup> | 741<br>628<br>397<br>718 | 1154<br>237        | CD                | RCT               | Observational    | Ustekinumab                     | Placebo        | -ADA formation              |
| 65                 | Sandborn 2008 <sup>105</sup><br>(UCDS)                                                                                                                                                                                                                                                                             | 104                      | 99                 | CD                | RCT               | Observational    | Ustekinumab                     | Placebo        | -ADA formation              |
| 66                 | Sandborn 2012b <sup>106</sup><br>(CERTIFI)                                                                                                                                                                                                                                                                         | 395                      | 427                | CD                | RCT               | Observational    | Ustekinumab                     | Placebo        | -ADA formation              |
| <b>ETROLIZUMAB</b> |                                                                                                                                                                                                                                                                                                                    |                          |                    |                   |                   |                  |                                 |                |                             |
|                    | <b>Study</b>                                                                                                                                                                                                                                                                                                       | <b>N</b>                 | <b>Sample size</b> | <b>Population</b> | <b>Study type</b> | <b>Data type</b> | <b>Intervention/ Population</b> | <b>Control</b> | <b>Outcomes of interest</b> |
| 67                 | Rutgeerts 2013 <sup>107</sup>                                                                                                                                                                                                                                                                                      | 48                       | 38                 | UC                | RCT               | Observational    | Etrolizumab                     | Placebo        | -ADA formation              |
| 68                 | Vermeire 2014 <sup>108</sup>                                                                                                                                                                                                                                                                                       | 124                      | 81                 | UC                | RCT               | Observational    | Etrolizumab                     | Placebo        | -ADA formation              |

CD, Crohn's disease; IM, immunosuppressive; ADA, anti-drug antibody; RCT, randomized controlled trial; TDM, therapeutic drug monitoring; UC, ulcerative colitis

**Supplementary Table 2: ADA formation rates and measurement time-points**

| <b>Infliximab</b>                                         |                     |                    |                   |                                                                                                                                                           |                       |  |
|-----------------------------------------------------------|---------------------|--------------------|-------------------|-----------------------------------------------------------------------------------------------------------------------------------------------------------|-----------------------|--|
| <b>Study</b>                                              | <b>Nr. Positive</b> | <b>Sample-size</b> | <b>Proportion</b> | <b>Measurement time-points</b>                                                                                                                            | <b>Time follow-up</b> |  |
| Baert 2003 <sup>1</sup>                                   | 76                  | 125                | 60.8%             | Unknown (variable)                                                                                                                                        | 36 months (median)    |  |
| Colombel 2010 <sup>2</sup><br><i>SONIC</i>                | 16                  | 219                | 7.3%              | weeks 0, 30, 46                                                                                                                                           | 30 weeks              |  |
| D'Haens 2018 <sup>4</sup>                                 | 21                  | 122                | 17.2%             | Weeks 0,2 ,4 ,6 , 12, 14, every 4 weeks                                                                                                                   | 54 weeks              |  |
| Farrell 2003 <sup>5</sup>                                 | 19                  | 53                 | 35.8%             | weeks 0, 24                                                                                                                                               | 20 weeks (median)     |  |
| Farrell 2003 <sup>5</sup>                                 | 27                  | 68                 | 39.7%             | weeks 0, 8, 16 weeks                                                                                                                                      | 16 weeks              |  |
| Feagan 2014 <sup>6</sup>                                  | 16                  | 126                | 12.7%             | weeks 1, 3, 7, 14, 22, 30, 38, 46, 50                                                                                                                     | 50 weeks              |  |
| Fernandes 2020 <sup>7</sup>                               | 13                  | 205                | 6.3%              | Week 14 and every 2 infusions                                                                                                                             | 104 weeks             |  |
| Hanauer 2002 <sup>8</sup><br><i>ACCENT-1</i> <sup>‡</sup> | 64                  | 442                | 14.5%             | Weeks 0, 14, 22, 54                                                                                                                                       | 54 weeks              |  |
| Jiang 2015 <sup>11</sup>                                  | 4                   | 78                 | 5.1%              | Weeks 0, 30                                                                                                                                               | 30 weeks              |  |
| Oh 2017 <sup>12</sup>                                     | 47                  | 138                | 34.1%             | Every infusion                                                                                                                                            | 47 months (median)    |  |
| Panaccione 2014 <sup>13</sup>                             | 8                   | 68                 | 11.8%             | Weeks 0, 16                                                                                                                                               | 16 weeks              |  |
| Present 1999 <sup>14</sup>                                | 3                   | 92                 | 3.3%              | Weeks 0, 2, 6                                                                                                                                             | 12 weeks              |  |
| Regueiro 2016 <sup>15</sup>                               | 24                  | 147                | 16.3%             | Weeks 0, 72                                                                                                                                               | 104 weeks             |  |
| Roblin 2017 <sup>16</sup>                                 | 6                   | 81                 | 7.4%              | Every infusion                                                                                                                                            | 56 weeks              |  |
| Rutgeerts 1999                                            | 7                   | 47                 | 14.9%             | Unknown                                                                                                                                                   | 48 weeks              |  |
| Rutgeerts 2005a <sup>18</sup><br><i>ACT-1</i>             | 14                  | 229                | 6.1%              | Weeks 0, 30, 54                                                                                                                                           | 54 weeks              |  |
| Rutgeerts 2005b <sup>18</sup><br><i>ACT-2</i>             | 12                  | 188                | 6.4%              | Weeks 0, 30                                                                                                                                               | 30 weeks              |  |
| Sands 2004 <sup>22</sup>                                  | 44                  | 258                | 17.1%             | Weeks 0, 14, 30, 54                                                                                                                                       | 54 weeks              |  |
| Seow 2010 <sup>23</sup>                                   | 44                  | 108                | 40.7%             | 10.7 months (median)<br>23 patients at week 1, 2, 4, 6, 14, 25<br>25 patients randomly for second measurement<br>median 20 weeks after first measurement. | 54 weeks              |  |
| Steenholdt 2015 <sup>25</sup>                             | 13                  | 42                 | 31.0%             | At time of IFX failure                                                                                                                                    | 12 weeks              |  |
| Targan 1997 <sup>27</sup>                                 | 6                   | 101 <sup>*</sup>   | 5.9%              | Week 12                                                                                                                                                   | 12 weeks              |  |
| Van Assche 2008 <sup>28</sup>                             | 7                   | 80                 | 8.8%              | Every 16 weeks                                                                                                                                            | 104 weeks             |  |
| Vande Casteele<br>2015 <sup>29</sup><br><i>TAXIT</i>      | 18                  | 275                | 2.9%              | Screening measurement                                                                                                                                     | Screening             |  |
| Vande Casteele<br>2015 <sup>29</sup><br><i>TAXIT</i>      | 3                   | 226                | 1.3%              | Every infusion                                                                                                                                            | 52 weeks              |  |
| Vermeire 2007 <sup>32</sup>                               | 96                  | 174                | 55.1%             | Before and 4 weeks after each infusion<br>(unscheduled)                                                                                                   | 42 weeks (median)     |  |
| Ye 2019 <sup>33</sup>                                     | 40                  | 220                | 18.2%             | Weeks 0, 14, 30, 54                                                                                                                                       | 54 weeks              |  |

|                                  |                                                   |    |         |         |                                             |           |
|----------------------------------|---------------------------------------------------|----|---------|---------|---------------------------------------------|-----------|
|                                  | Yokoyama 2017 <sup>34</sup>                       | 1  | 21      | 4.8%    | Unknown                                     | 54 weeks  |
| <b>Adalimumab</b>                |                                                   |    |         |         |                                             |           |
|                                  | Bodini 2014 <sup>35</sup>                         | 1  | 6       | 16.7%   | Every 8 weeks                               | 104 weeks |
|                                  | Hanauer 2006 <sup>37</sup><br><i>CLASSIC-I</i>    | 1  | 225     | 0.4%    | Weeks 0, 1, 2, 4                            | 4 weeks   |
|                                  | Matusumoto 2016 <sup>38</sup>                     | 13 | 151     | 8.6%    | Week 26                                     | 52 weeks  |
|                                  | Sandborn 2007a <sup>41</sup><br><i>CLASSIC II</i> | 7  | 269*    | 2.6%    | Week 0, 2, 4, 8, 12, 20, 24, 32, 40, 48, 56 | 56 weeks  |
|                                  | Sandborn 2007b <sup>42</sup><br><i>CLASSIC I</i>  | 0  | 159     | 0%      | Week 0, 1, 2, 4                             | 4 weeks   |
|                                  | Sandborn 2012a <sup>43</sup>                      | 7  | 245     | 2.9%    | Week 0, 8, 32, 52, early termination        | 52 weeks  |
|                                  | Suzuki 2014 <sup>46</sup>                         | 12 | 240     | 5.0%    | Week 2, 4, 8, 32, 52                        | 52 weeks  |
|                                  | Watanabe 2012 <sup>48</sup>                       | 5  | 67      | 7.5%    | Week 0, 4, 8, 12, 16, 20, 24, 36, 52        | 52 weeks  |
|                                  | Wright 2018 <sup>50</sup>                         | 15 | 52      | 28.8%   | Month 6, 12 and 18                          | 18 months |
|                                  | Wu 2016 <sup>51</sup>                             | 0  | 30      | 0%      | Week 0, 4 and 8                             | 10 weeks  |
| <b>Infliximab and adalimumab</b> |                                                   |    |         |         |                                             |           |
|                                  | Roblin 2020 <sup>52</sup>                         | 90 | unknown | unknown | Month 6, 12, 18, 24                         | 24 months |
| <b>Vedolizumab</b>               |                                                   |    |         |         |                                             |           |
|                                  | Feagan 2005 <sup>72</sup>                         | 13 | 30      | 43.3%   | Weeks 4, 8                                  | 8 weeks   |
|                                  | Feagan 2008 <sup>73</sup>                         | 29 | 128     | 22.7%   | Days 1, 43, 155, 267, 379, 491              | 8 weeks   |
|                                  | Feagan 2013 <sup>74</sup>                         | 23 | 620     | 3.7%    | Every 12 weeks                              | 52 weeks  |
|                                  | Parikh 2012 <sup>81</sup>                         | 4  | 37      | 10.8%   | Days 1, 43, 155, 267, 379, 491              | 78 weeks  |
|                                  | Parikh 2013<br>(extension)                        | 3  | 72      | 4.2%    |                                             |           |
|                                  | Sandborn 2013 <sup>83</sup>                       | 33 | 814     | 4.2%    | Unknown                                     | 52 weeks  |
|                                  | Sands 2014 <sup>87</sup>                          | 3  | 209     | 1.4%    | Week 0, 6, 10                               | 22 weeks  |
|                                  | Motoya 2019 <sup>80</sup>                         | 5  | 167     | 3.0%    | Week 0, 10, 30, 60                          | 60 weeks  |
|                                  | Sandborn 2020 <sup>85</sup>                       | 6  | 106     | 5.7%    | Week 0, 6, 8, 14, 22, 30, 38, 46, 52        | 52 weeks  |
|                                  | Watanabe 2020 <sup>88</sup>                       | 1  | 60      | 1.7%    | Week 0, 10, 30, 60, 76                      | 60 weeks  |
| <b>Natalizumab</b>               |                                                   |    |         |         |                                             |           |
|                                  | Ghosh 2003 <sup>89</sup>                          | 13 | 185     | 7.0%    | Week 6                                      | 6 weeks   |
|                                  | Gordon 2001 <sup>90</sup>                         | 2  | 18      | 11.1%   | Week 1, 2, 4, 8, 12                         | 12 weeks  |
|                                  | Gordon 2002 <sup>91</sup>                         | 1  | 10      | 10.0%   | Week 2                                      | 2 weeks   |
|                                  | Sandborn 2005a <sup>92</sup><br><i>ENACT-1</i>    | 53 | 723     | 7.3%    | Week 10                                     | 10 weeks  |
|                                  | Sandborn 2005b <sup>92</sup><br><i>ENACT-2</i>    | 36 | 214     | 16.8%   | Week 36                                     | 36 weeks  |
|                                  | Targan 2007 <sup>93</sup>                         | 23 | 241     | 9.5%    | Week 8                                      | 12 weeks  |
|                                  | Sands 2007 <sup>94</sup>                          | 2  | 52      | 3.8%    | Week 10                                     | 10 weeks  |
| <b>Ustekinumab</b>               |                                                   |    |         |         |                                             |           |

|                           |                                                                                  |     |      |       |                                                                                                                                  |          |
|---------------------------|----------------------------------------------------------------------------------|-----|------|-------|----------------------------------------------------------------------------------------------------------------------------------|----------|
|                           | Feagan 2016 <sup>98</sup><br><i>UNITI-1</i><br><i>UNITI-2</i><br><i>IM-UNITI</i> | 44  | 1154 | 3.8%  | Week 0, 6, 12, 24, 36, 44                                                                                                        | 52 weeks |
|                           | Sands 2019 <sup>95</sup><br>(UNIFI)                                              | 23  | 505  | 4.6%  | Week 0, 4, 8, 12, 16, 24, 36, 44                                                                                                 | 52 weeks |
|                           | Sandborn 2008 <sup>105</sup><br>(UCDS)                                           | 0   | 99   | 0%    | Week 0, 16, 28, 54                                                                                                               | 28 weeks |
|                           | Sandborn 2012b <sup>106</sup><br>(CERTIFI)                                       | 3   | 427  | 0.7%  | Week 0, 22, 36                                                                                                                   | 36 weeks |
| <b>Certolizumab Pegol</b> |                                                                                  |     |      |       |                                                                                                                                  |          |
|                           | Sandborn 2007c <sup>63</sup><br>PRECISE-1                                        | 26  | 331  | 7.9%  | Week 0, 2, 4, 6, 8, 12, 16, 20, 24, 26                                                                                           | 26 weeks |
|                           | Sandborn 2010b <sup>65</sup><br><i>PRECISE 4</i>                                 | 30  | 124  | 24.2% | Week 0, 2, 4, 6, 8, 12, 12, 16, 18, 20, 22, ,24, 26                                                                              | 26 weeks |
|                           | Sandborn 2011 <sup>67</sup>                                                      | 7   | 223  | 3.1%  | Week 2, 4, 6                                                                                                                     | 6 weeks  |
|                           | Sandborn 2017 <sup>68</sup><br><i>PRECISE-3</i>                                  | 134 | 595  | 22.5% | Week 0, every 4 weeks to week 106, week 130, 158, 182, 234, 258, 318                                                             | 80 weeks |
|                           | Schreiber 2005 <sup>70</sup>                                                     | 9   | 73   | 12.3% | Unknown                                                                                                                          | 12 weeks |
|                           | Schreiber 2007 <sup>71</sup><br>PRECISE-2                                        | 58  | 668  | 8.7%  | Week 0, 2, 4, 6, 8, 12, 16, 20, 24, 26                                                                                           | 26 weeks |
| <b>Golimumab</b>          |                                                                                  |     |      |       |                                                                                                                                  |          |
|                           | Hibi 2017 <sup>53</sup><br><i>PURSUIT-J</i>                                      | 5   | 123  | 4.1%  | Week 0, 6, 28, 30, 52, 54, 68                                                                                                    | 54 weeks |
|                           | Rutgeerts 2015 <sup>54</sup><br><i>PURSUIT-IV</i>                                | 0   | 206  | 0%    | Week 0, 6, 30, 54 week                                                                                                           | 54 weeks |
|                           | Sandborn 2014 <sup>55, 56</sup>                                                  | 32  | 1103 | 2.9%  | Week 0, 6, 30, 54                                                                                                                | 54 weeks |
| <b>Etrolizumab</b>        |                                                                                  |     |      |       |                                                                                                                                  |          |
|                           | Rutgeerts 2013 <sup>107</sup>                                                    | 2   | 38   | 5.3%  | Day 1, 15, 29, 57, 99, 127 in single ascending dose stage<br>Day 1, 29, 57, 64, 85, 113, 141, 169, 197 in maintenance dose stage | 197 days |
|                           | Vermeire 2014 <sup>108</sup>                                                     | 4   | 81   | 4.9%  | Day 1, 5, 15, 29, 43, 57, 61, 71, 85, 113, 141                                                                                   | 10 weeks |

\*Sample-size including placebo

**Supplementary Table 3:** Quality assessment of the randomized controlled studies

|                   | Study                                         | Random sequence allocation | Allocation concealment | Blinding of participants and personnel | Blinding of outcome assessment | Incomplete outcome data | Selective Reporting | Other sources of bias |
|-------------------|-----------------------------------------------|----------------------------|------------------------|----------------------------------------|--------------------------------|-------------------------|---------------------|-----------------------|
| <b>Infliximab</b> |                                               |                            |                        |                                        |                                |                         |                     |                       |
|                   | Colombel 2010 <sup>2</sup><br><i>SONIC</i>    | Low risk                   | Low risk               | Low risk                               | Low risk                       | Unclear risk            | Low risk            | Low risk              |
|                   | D'Haens 2018 <sup>4</sup>                     | Low risk                   | Low risk               | Low risk                               | Low risk                       | Low risk                | Low risk            | Low risk              |
|                   | Farrell 2003 <sup>5</sup> (study 2)           | Low risk                   | Unclear risk           | Low risk                               | Low risk                       | Unclear risk            | Low risk            | Low risk              |
|                   | Feagan 2014 <sup>6</sup>                      | Low risk                   | Low risk               | Low risk                               | Low risk                       | Low risk                | Low risk            | Low risk              |
|                   | Hanauer 2002 <sup>8</sup><br><i>ACCENT-1</i>  | Low risk                   | Low risk               | Low risk                               | Unclear risk                   | Low risk                | Low risk            | Low risk              |
|                   | Jiang 2015 <sup>11</sup>                      | Low risk                   | Unclear risk           | Low risk                               | Unclear risk                   | High risk               | Low risk            | Low risk              |
|                   | Panaccione 2014 <sup>13</sup>                 | Low risk                   | Low risk               | Low risk                               | Unclear risk                   | Low risk                | Low risk            | Low risk              |
|                   | Present 1999 <sup>14</sup>                    | Low risk                   | Low risk               | Low risk                               | Unclear risk                   | Low risk                | Low risk            | Low risk              |
|                   | Regueiro 2016 <sup>15</sup>                   | Low risk                   | Low risk               | Low risk                               | Low risk                       | Unclear risk            | Low risk            | Low risk              |
|                   | Roblin 2017 <sup>16</sup>                     | Low risk                   | Low risk               | Low risk                               | Unclear risk                   | Low risk                | Low risk            | Low risk              |
|                   | Rutgeerts 1999 <sup>17</sup>                  | Unclear risk               | Unclear risk           | Low risk                               | Unclear risk                   | Low risk                | Low risk            | Low risk              |
|                   | Rutgeerts 2005a <sup>18</sup><br><i>ACT-1</i> | Low risk                   | Low risk               | Low risk                               | Low risk                       | Low risk                | Low risk            | Low risk              |
|                   | Rutgeerts 2005b <sup>18</sup><br><i>ACT-2</i> | Low risk                   | Low risk               | Low risk                               | Low risk                       | Low risk                | Low risk            | Low risk              |
|                   | Sands 2004 <sup>22</sup>                      | Low risk                   | Low risk               | Low risk                               | Unclear risk                   | Low risk                | Low risk            | Low risk              |
|                   | Steenholdt 2014 <sup>25</sup>                 | Low risk                   | Low risk               | Low risk                               | Unclear risk                   | Unclear risk            | Low risk            | Low risk              |
|                   | Targan 1997 <sup>27</sup>                     | Low risk                   | Low risk               | Low risk                               | Unclear risk                   | Low risk                | Low risk            | Low risk              |
|                   | Van Assche 2008 <sup>28</sup>                 | Unclear risk               | Low risk               | High risk                              | Unclear risk                   | Low risk                | Low risk            | Low risk              |
|                   | Vande Casteele 2015 <sup>29</sup>             | Low risk                   | Low risk               | Low risk                               | Low risk                       | Low risk                | Low risk            | Low risk              |
|                   | Ye 2019 <sup>33</sup>                         | Low risk                   | Low risk               | Low risk                               | Low risk                       | Low risk                | Low risk            | Low risk              |
| <b>Adalimumab</b> |                                               |                            |                        |                                        |                                |                         |                     |                       |
|                   | Bodini 2014 <sup>35</sup>                     | Low risk                   | Low risk               | Low risk                               | Low risk                       | Low risk                | Low risk            | Low risk              |
|                   | Hanauer 2006 <sup>37</sup>                    | Low risk                   | Low risk               | Low risk                               | Unclear risk                   | Low risk                | Low risk            | Low risk              |
|                   | Matsumoto 2016 <sup>38</sup>                  | Low risk                   | Low risk               | High risk                              | High risk                      | Low risk                | Low risk            | Low risk              |
|                   | Sandborn 2007a <sup>41</sup>                  | Low risk                   | Low risk               | Low risk                               | Unclear risk                   | Low risk                | Low risk            | Low risk              |
|                   | Sandborn 2007b <sup>42</sup>                  | Low risk                   | Low risk               | Low risk                               | Unclear risk                   | Low risk                | Low risk            | Low risk              |
|                   | Suzuki 2014 <sup>46</sup>                     | Unclear risk               | Unclear risk           | Low risk                               | Unclear risk                   | Low risk                | Low risk            | Low risk              |
|                   | Sandborn 2012a <sup>43</sup>                  | Low risk                   | Unclear risk           | Low risk                               | Unclear risk                   | Low risk                | Low risk            | Low risk              |
|                   | Watanabe 2012 <sup>48</sup>                   | Low risk                   | Unclear risk           | Low risk                               | Unclear risk                   | Low risk                | Low risk            | Low risk              |
|                   | Wright 2018 <sup>50</sup>                     | Low risk                   | Unclear risk           | High risk                              | Low risk                       | Low risk                | Low risk            | Low risk              |
|                   | Wu 2016 <sup>51</sup>                         | Low risk                   | Unclear risk           | Low risk                               | Unclear risk                   | Low risk                | Low risk            | Low risk              |



**Infliximab and adalimumab**

|                           |                                      |              |              |           |              |              |          |          |
|---------------------------|--------------------------------------|--------------|--------------|-----------|--------------|--------------|----------|----------|
|                           | Roblin 2020 <sup>52</sup>            | Low risk     | Low risk     | Low risk  | Low risk     | Low risk     | Low risk | Low risk |
| <b>Golimumab</b>          |                                      |              |              |           |              |              |          |          |
|                           | Hibi 2017 <sup>53</sup>              | Low risk     | Low risk     | Low risk  | Unclear risk | Low risk     | Low risk | Low risk |
|                           | Rutgeerts 2015 <sup>54</sup>         | Low risk     | Low risk     | Low risk  | Unclear risk | Low risk     | Low risk | Low risk |
|                           | Sandborn 2014 <sup>55, 56</sup>      | Low risk     | Low risk     | Low risk  | Unclear risk | Low risk     | Low risk | Low risk |
| <b>Certolizumab Pegol</b> |                                      |              |              |           |              |              |          |          |
|                           | Sandborn 2007c <sup>63</sup>         | Low risk     | Low risk     | Low risk  | Unclear risk | Low risk     | Low risk | Low risk |
|                           | Sandborn 2010a <sup>109</sup>        | Low risk     | Low risk     | Low risk  | Unclear risk | Low risk     | Low risk | Low risk |
|                           | Sandborn 2010b <sup>65</sup>         | Low risk     | Low risk     | High risk | Unclear risk | Low risk     | Low risk | Low risk |
|                           | Sandborn 2011 <sup>67</sup>          | Low risk     | Low risk     | Low risk  | Unclear risk | Low risk     | Low risk | Low risk |
|                           | Sandborn 2017 <sup>68</sup>          | Low risk     | Low risk     | High risk | Low risk     | Low risk     | Low risk | Low risk |
|                           | Schreiber 2005 <sup>70</sup>         | Low risk     | Low risk     | Low risk  | Unclear risk | Low risk     | Low risk | Low risk |
|                           | Schreiber 2007 <sup>71</sup>         | Low risk     | Low risk     | Low risk  | Low risk     | Unclear risk | Low risk | Low risk |
| <b>Vedolizumab</b>        |                                      |              |              |           |              |              |          |          |
|                           | Feagan 2005 <sup>72</sup>            | Low risk     | Unclear risk | Low risk  | Unclear risk | Low risk     | Low risk | Low risk |
|                           | Feagan 2008 <sup>73</sup>            | Unclear risk | Unclear risk | Low risk  | Unclear risk | Low risk     | Low risk | Low risk |
|                           | Feagan 2013 <sup>74</sup>            | Low risk     | Low risk     | Low risk  | Low risk     | Unclear risk | Low risk | Low risk |
|                           | Motoya 2019 <sup>80</sup>            | Low risk     | Low risk     | High risk | Unclear risk | Low risk     | Low risk | Low risk |
|                           | Parikh 2012 <sup>81</sup>            | Low risk     | Unclear risk | High risk | High risk    | Unclear risk | Low risk | Low risk |
|                           | Sandborn 2013 <sup>83</sup>          | Low risk     | Low risk     | Low risk  | Unclear risk | Low risk     | Low risk | Low risk |
|                           | Sands 2014 <sup>87</sup>             | Low risk     | Low risk     | Low risk  | Unclear risk | Low risk     | Low risk | Low risk |
|                           | Sandborn 2020 <sup>85</sup>          | Low risk     | Low risk     | Low risk  | Low risk     | Low risk     | Low risk | Low risk |
|                           | Watanabe 2020 <sup>88</sup>          | Low risk     | Low risk     | Low risk  | Low risk     | Low risk     | Low risk | Low risk |
| <b>Natalizumab</b>        |                                      |              |              |           |              |              |          |          |
|                           | Ghosh 2003 <sup>89</sup>             | Low risk     | Unclear risk | Low risk  | Unclear risk | Low risk     | Low risk | Low risk |
|                           | Gordon 2001 <sup>90</sup>            | Unclear risk | Low risk     | Low risk  | Unclear risk | Low risk     | Low risk | Low risk |
|                           | Sandborn 2005a <sup>92</sup>         | Unclear risk | Unclear risk | Low risk  | Unclear risk | Low risk     | Low risk | Low risk |
|                           | Sandborn 2005b <sup>92</sup>         | Low risk     | Low risk     | Low risk  | Unclear risk | Low risk     | Low risk | Low risk |
|                           | Targan 2007 <sup>93</sup>            | Unclear risk | Unclear risk | Low risk  | Unclear risk | Low risk     | Low risk | Low risk |
|                           | Sands 2007 <sup>94</sup>             | Low risk     | Low risk     | Low risk  | Unclear risk | Low risk     | Low risk | Low risk |
| <b>Ustekinumab</b>        |                                      |              |              |           |              |              |          |          |
|                           | Feagan 2016 <sup>98</sup><br>UNITI-1 | Low risk     | Low risk     | Low risk  | Low risk     | Low risk     | Low risk | Low risk |
|                           | UNITI-2                              | Low risk     | Low risk     | Low risk  | Low risk     | Low risk     | Low risk | Low risk |
|                           | IM-UNITI                             | Low risk     | Low risk     | Low risk  | Low risk     | Low risk     | Low risk | Low risk |
|                           | Sandborn 2008 <sup>105</sup>         | Low risk     | Low risk     | Low risk  | Unclear risk | Low risk     | Low risk | Low risk |
|                           | Sandborn 2012b <sup>106</sup>        | Low risk     | Low risk     | Low risk  | Unclear risk | Low risk     | Low risk | Low risk |
|                           | Sands 2019 <sup>95</sup>             | Low risk     | Low risk     | Low risk  | Low risk     | Low risk     | Low risk | Low risk |
| <b>Etrolizumab</b>        |                                      |              |              |           |              |              |          |          |
|                           | Rutgeerts 2013 <sup>107</sup>        | Low risk     | Unclear risk | Low risk  | Low risk     | Unclear risk | Low risk | Low risk |
|                           | Vermeire 2014 <sup>108</sup>         | Low risk     | Low risk     | Low risk  | Low risk     | Low risk     | Low risk | Low risk |

**Supplementary Table 4:** Quality assessment of the observational studies\*

|                           | Study                               | Selection (Max 4) | Comparability (Max 2) | Outcome (Max 3) | Total (Max 9) |
|---------------------------|-------------------------------------|-------------------|-----------------------|-----------------|---------------|
| <b>Infliximab</b>         |                                     |                   |                       |                 |               |
|                           | Baert 2003 <sup>1</sup>             | ****              | **                    | ***             | 9             |
|                           | Farrell 2003 <sup>5</sup> (study 1) | ****              | **                    | ***             | 9             |
|                           | Fernandes 2020 <sup>7</sup>         |                   |                       |                 |               |
|                           | Oh 2017 <sup>12</sup>               | ****              | **                    | **1             | 8             |
|                           | Seow 2010 <sup>23</sup>             | ****              | **                    | ***             | 9             |
|                           | Vermeire 2007 <sup>32</sup>         | ****              | **                    | ***             | 9             |
|                           | Yokoyama 2017 <sup>34</sup>         | ****              | -                     | **1             | 6             |
| <b>Adalimumab</b>         |                                     |                   |                       |                 |               |
|                           | Regueiro 2016 <sup>15</sup>         | ***3              | **                    | **1             | 8             |
|                           | Roblin 2017 <sup>16</sup>           | ****              | **                    | **1             | 8             |
|                           | Rutgeerts 2005a <sup>18</sup>       | ****              | **                    | **1             | 8             |
|                           | Rutgeerts 2005b <sup>18</sup>       | ****              | **                    | **1             | 8             |
|                           | Sands 2004 <sup>22</sup>            | ***2              | **                    | **1             | 7             |
| <b>Certolizumab pegol</b> |                                     |                   |                       |                 |               |
|                           | Gordon 2002 <sup>91</sup>           | ****              | **                    | **1             | 8             |
|                           | Sandborn 2016 <sup>110</sup>        | ****              | **                    | **1             | 8             |

\*The Newcastle-Ottawa Quality Assessment Scale for case-control studies was used for observational data. Comparisons of monotherapy versus combination therapy were considered observational if the patients were not randomized to monotherapy or combination therapy and the study reported event(s) of interest in these two groups.

<sup>1</sup>Unclear whether the assessment was independent and blinded

<sup>2</sup>Only included patients with fistulizing Crohn's disease

<sup>3</sup>Only included patients with CD who had undergone ileocolonic resection with ileocolonic anastomosis

<sup>4</sup>Single-country study

**Supplementary Figure 1: ADA formation in infliximab combotherapy with thiopurine versus monotherapy (sensitivity analysis)**

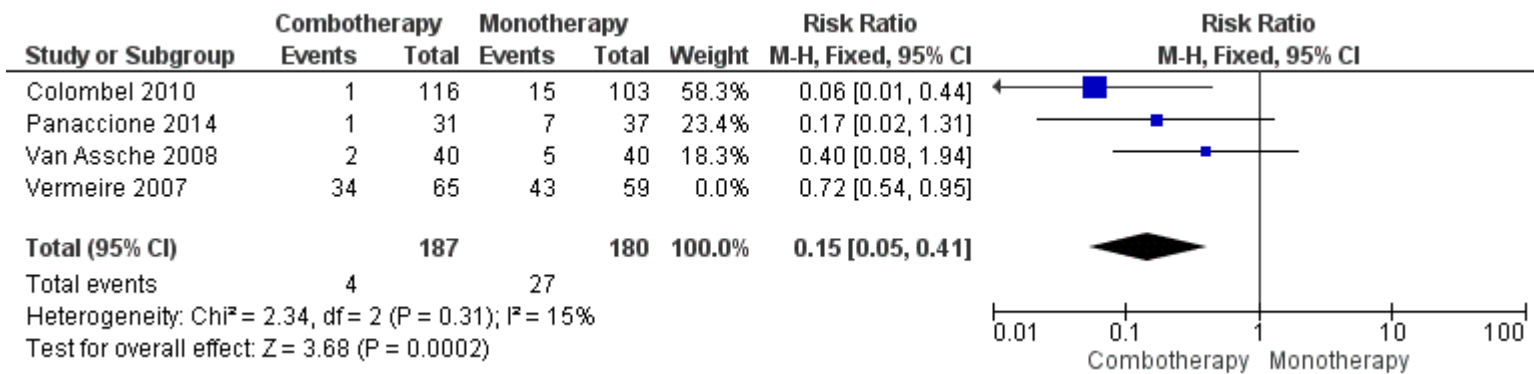

**Supplementary Figure 2: ADA formation in infliximab combotherapy versus monotherapy in drug tolerant assays (sensitivity analysis)**

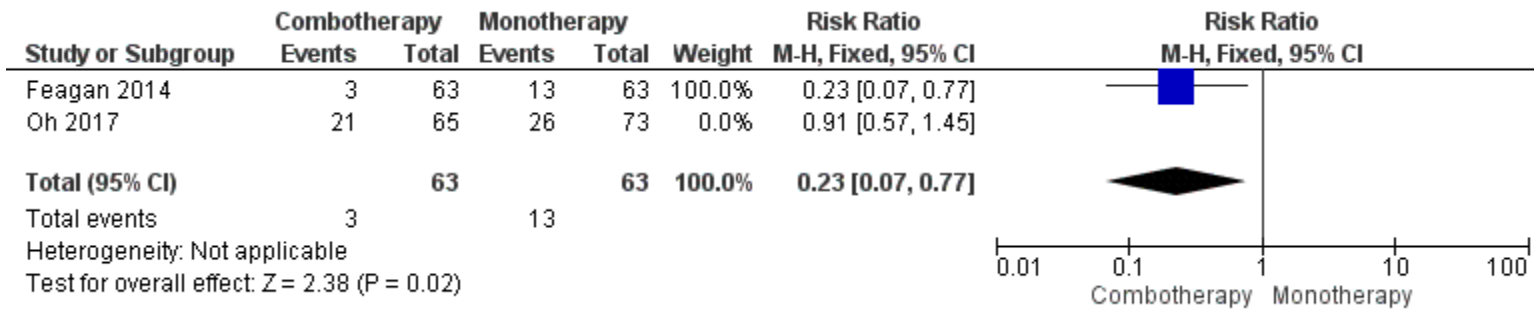

**Supplementary figure 3: ADA formation in golimumab combo- versus monotherapy**

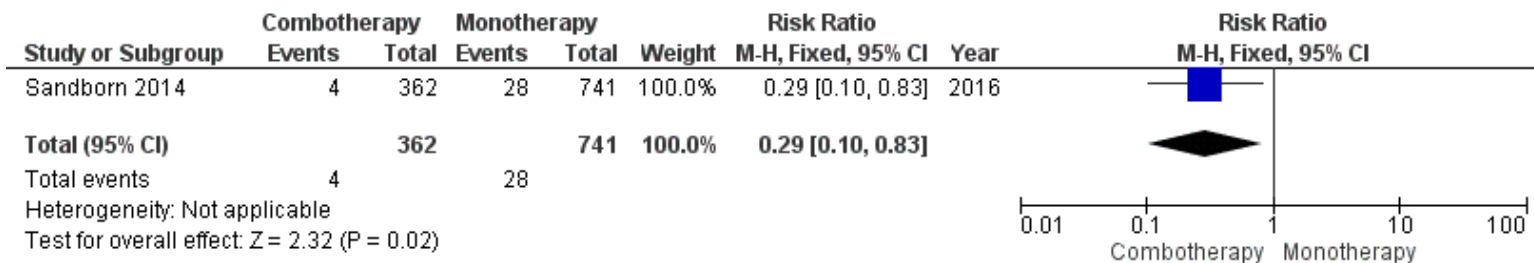

**Supplementary figure 4: ADA formation in ustekinumab combotherapy versus monotherapy**

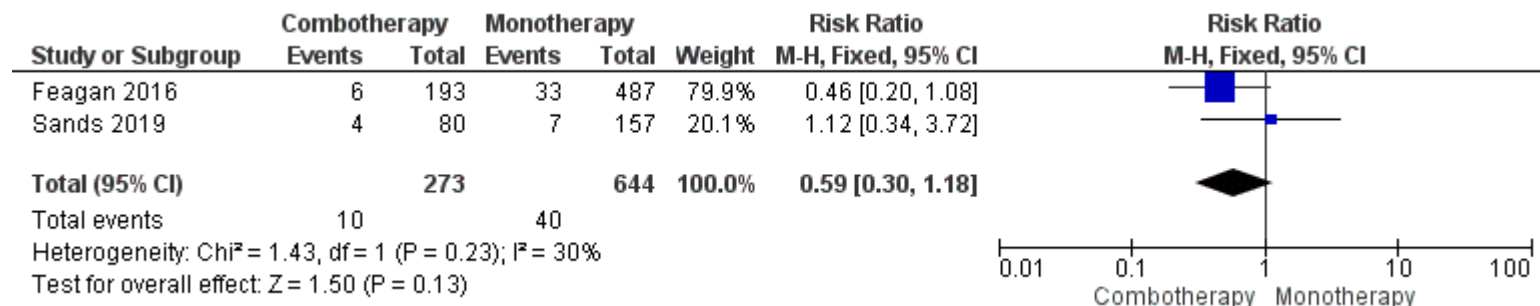

**Supplementary Figure 5: ADA formation in natalizumab combotherapy versus monotherapy.**

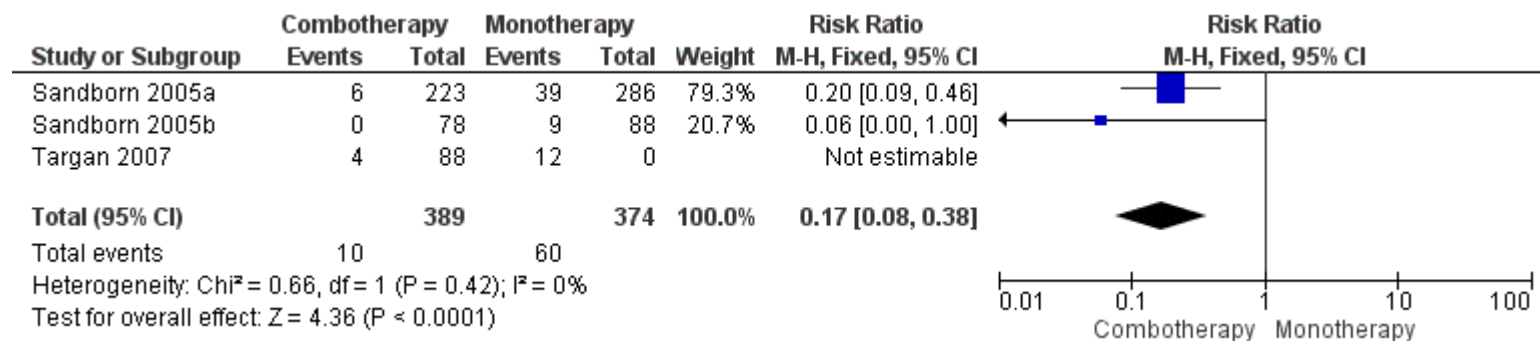

## Supplementary References

1. Baert F, Noman M, Vermeire S, et al. Influence of immunogenicity on the long-term efficacy of infliximab in Crohn's disease. *N Engl J Med*. 2003;348(7):601-8.
2. Colombel JF, Sandborn WJ, Reinisch W, et al. Infliximab, azathioprine, or combination therapy for Crohn's disease. *N Engl J Med*. 2010;362(15):1383-95.
3. Colombel JF, Adedokun OJ, Gasink C, et al. Higher levels of infliximab may alleviate the need of azathioprine comedication in the treatment of patients with Crohn's disease: a SONIC post hoc analysis. *Journal of crohn's and colitis Conference: 12th congress of the european crohn's and colitis organisation, ECCO 2017 Spain*. 2017;11(Supplement 1):S135-S6.
4. D'Haens G, Vermeire S, Lambrecht G, et al. Increasing Infliximab Dose Based on Symptoms, Biomarkers, and Serum Drug Concentrations Does Not Increase Clinical, Endoscopic, and Corticosteroid-Free Remission in Patients With Active Luminal Crohn's Disease. *Gastroenterology*. 2018;154(5):1343-51.e1.
5. Farrell RJ, Alsahli M, Jeen YT, et al. Intravenous hydrocortisone premedication reduces antibodies to infliximab in Crohn's disease: a randomized controlled trial. *Gastroenterology*. 2003;124(4):917-24.
6. Feagan BG, McDonald JW, Panaccione R, et al. Methotrexate in combination with infliximab is no more effective than infliximab alone in patients with Crohn's disease. *Gastroenterology*. 2014;146(3):681-8 e1. Epub 2013/11/26.
7. Fernandes SR, Bernardo S, Simoes C, et al. Proactive Infliximab Drug Monitoring Is Superior to Conventional Management in Inflammatory Bowel Disease. *Inflammatory bowel diseases*. 2020;26(2):263-70.
8. Hanauer SB, Feagan BG, Lichtenstein GR, et al. Maintenance infliximab for Crohn's disease: the ACCENT I randomised trial. *Lancet*. 2002;359(9317):1541-9.
9. Rutgeerts P, Feagan BG, Lichtenstein GR, et al. Comparison of scheduled and episodic treatment strategies of infliximab in Crohn's disease. *Gastroenterology*. 2004;126(2):402-13.
10. Hanauer SB, Wagner CL, Bala M, et al. Incidence and importance of antibody responses to infliximab after maintenance or episodic treatment in Crohn's disease. *Clinical Gastroenterology & Hepatology*. 2004;2:542-53.
11. Jiang XL, Cui HF, Gao J, et al. Low-dose Infliximab for Induction and Maintenance Treatment in Chinese Patients With Moderate to Severe Active Ulcerative Colitis. *Journal of clinical gastroenterology*. 2015;49(7):582-8. Epub 2015/04/07.
12. Oh EH, Ko D-H, Seo H, et al. Clinical correlations of infliximab trough levels and antibodies to infliximab in South Korean patients with Crohn's disease. *World journal of gastroenterology*. 2017;23(8):1489-96. Epub 02/28.
13. Panaccione R, Ghosh S, Middleton S, et al. Combination therapy with infliximab and azathioprine is superior to monotherapy with either agent in ulcerative colitis. *Gastroenterology*. 2014;146(2):392-400.e3. Epub 2014/02/12.
14. Present DH, Rutgeerts P, Targan S, et al. Infliximab for the treatment of fistulas in patients with Crohn's disease. *New England Journal of Medicine*. 1999;340(18):1398-405.
15. Regueiro M, Feagan BG, Zou B, et al. Infliximab Reduces Endoscopic, but Not Clinical, Recurrence of Crohn's Disease After Ileocolonic Resection. *Gastroenterology*. 2016;150(7):1568-78.
16. Roblin X, Boschetti G, Williet N, et al. Azathioprine dose reduction in inflammatory bowel disease patients on combination therapy: an open-label, prospective and randomised clinical trial. *Alimentary pharmacology & therapeutics*. 2017;46(2):142-9. Epub 2017/04/28.
17. Rutgeerts P, D'Haens G, Targan S, et al. Efficacy and safety of retreatment with anti-tumor necrosis factor antibody (infliximab) to maintain remission in Crohn's disease. *Gastroenterology*. 1999;117(4):761-9. Epub 1999/09/29.
18. Rutgeerts P, Sandborn WJ, Feagan BG, et al. Infliximab for induction and maintenance therapy for ulcerative colitis. *N Engl J Med*. 2005;353(23):2462-76.
19. Reinisch W, Sandborn WJ, Rutgeerts P, et al. Long-term infliximab maintenance therapy for ulcerative colitis: the ACT-1 and -2 extension studies. *Inflammatory bowel diseases*. 2012;18(2):201-11. Epub 2011/04/13.

20. Adedokun OJ, Sandborn WJ, Feagan BG, et al. Association between serum concentration of infliximab and efficacy in adult patients with ulcerative colitis. *Gastroenterology*. 2014;147(6):1296-307.e5. Epub 2014/09/01.
21. Vande Casteele N, Jeyarajah J, Jairath V, et al. Infliximab Exposure-Response Relationship and Thresholds Associated With Endoscopic Healing in Patients With Ulcerative Colitis. *Clinical Gastroenterology & Hepatology*. 2019;17(9):1814-21.e1.
22. Sands BE, Anderson FH, Bernstein CN, et al. Infliximab maintenance therapy for fistulizing Crohn's disease. *N Engl J Med*. 2004;350(9):876-85.
23. Seow CH, Newman A, Irwin SP, et al. Trough serum infliximab: a predictive factor of clinical outcome for infliximab treatment in acute ulcerative colitis. *Gut*. 2010;59(1):49-54. Epub 2009/08/05.
24. Steenholdt C, Bendtzen K, Brynskov J, et al. Clinical implications of measuring drug and anti-drug antibodies by different assays when optimizing infliximab treatment failure in Crohn's disease: post hoc analysis of a randomized controlled trial. *The American journal of gastroenterology*. 2014;109(7):1055-64. Epub 2014/05/07.
25. Steenholdt C, Bendtzen K, Brynskov J, et al. Changes in serum trough levels of infliximab during treatment intensification but not in anti-infliximab antibody detection are associated with clinical outcomes after therapeutic failure in Crohn's disease. *Journal of Crohn's & colitis*. 2015;9(3):238-45. Epub 2015/01/13.
26. Edlund H, Steenholdt C, Ainsworth MA, et al. Magnitude of Increased Infliximab Clearance Imposed by Anti-infliximab Antibodies in Crohn's Disease Is Determined by Their Concentration. *AAPS Journal*. 2017;19(1):223-33.
27. Targan SR, Hanauer SB, van Deventer SJ, et al. A short-term study of chimeric monoclonal antibody cA2 to tumor necrosis factor alpha for Crohn's disease. Crohn's Disease cA2 Study Group. *N Engl J Med*. 1997;337(15):1029-35. Epub 1997/10/09.
28. Van Assche G, Magdelaine-Beuzelin C, D'Haens G, et al. Withdrawal of immunosuppression in Crohn's disease treated with scheduled infliximab maintenance: a randomized trial. *Gastroenterology*. 2008;134(7):1861-8.
29. Vande Casteele N, Ferrante M, Van Assche G, et al. Trough concentrations of infliximab guide dosing for patients with inflammatory bowel disease. *Gastroenterology*. 2015;148(7):1320-9 e3.
30. Van Stappen T, Vande Casteele N, Van Assche G, et al. Clinical relevance of detecting anti-infliximab antibodies with a drug-tolerant assay: post-hoc analysis of the taxit trial. *Journal of Crohn's & colitis*. 2017;11:S44-S5.
31. Van Stappen T, Vande Casteele N, Van Assche G, et al. Clinical relevance of detecting anti-infliximab antibodies with a drug-tolerant assay: post hoc analysis of the TAXIT trial. *Gut*. 2018;67(5):818-26.
32. Vermeire S, Noman M, Van Assche G, et al. Effectiveness of concomitant immunosuppressive therapy in suppressing the formation of antibodies to infliximab in Crohn's disease. *Gut*. 2007;56(9):1226-31. Epub 2007/01/19.
33. Ye BD, Pesegova M, Alexeeva O, et al. Efficacy and safety of biosimilar CT-P13 compared with originator infliximab in patients with active Crohn's disease: an international, randomised, double-blind, phase 3 non-inferiority study. *Lancet*. 2019;393(10182):1699-707.
34. Yokoyama K, Kawagishi K, Kobayashi K, et al. Current status of the effectiveness of infliximab in patients with ulcerative colitis. *Journal of crohn's and colitis Conference: 12th congress of the european crohn's and colitis organisation, ECCO 2017 Spain*. 2017;11(Supplement 1):S370-S1.
35. Bodini G, Savarino V, Peyrin-Biroulet L, et al. Low serum trough levels are associated with post-surgical recurrence in Crohn's disease patients undergoing prophylaxis with adalimumab. *Digestive and liver disease : official journal of the Italian Society of Gastroenterology and the Italian Association for the Study of the Liver*. 2014;46(11):1043-6. Epub 2014/08/30.
36. Savarino E, Bodini G, Dulbecco P, et al. Adalimumab is more effective than azathioprine and mesalamine at preventing postoperative recurrence of Crohn's disease: a randomized controlled trial. *The American journal of gastroenterology*. 2013;108(11):1731-42. Epub 2013/09/11.
37. Hanauer SB, Sandborn WJ, Rutgeerts P, et al. Human anti-tumor necrosis factor monoclonal antibody (adalimumab) in Crohn's disease: the CLASSIC-I trial. *Gastroenterology*. 2006;130(2):323-33; quiz 591.

38. Matsumoto T, Motoya S, Watanabe K, et al. Adalimumab Monotherapy and a Combination with Azathioprine for Crohn's Disease: A Prospective, Randomized Trial. *Journal of Crohn's & colitis*. 2016;10(11):1259-66. Epub 2016/10/30.
39. Motoya S, Nakase H, Matsumoto T, et al. Association between pharmacokinetics of adalimumab and disease outcome in Japanese patients with biologics naïve Crohn's disease: A subanalysis of DIAMOND trial. *Journal of Crohn's and Colitis*. 2017;11 (Supplement 1):S345-S6.
40. Nakase H, Motoya S, Matsumoto T, et al. Association between pharmacokinetics of adalimumab and disease outcome in Japanese patients with biologics naïve Crohn's disease: a subanalysis of diamond study. *Gastroenterology*. 2017;152(5):S746-.
41. Sandborn WJ, Hanauer SB, Rutgeerts P, et al. Adalimumab for maintenance treatment of Crohn's disease: results of the CLASSIC II trial. *Gut*. 2007;56(9):1232-9. Epub 2007/02/15.
42. Sandborn WJ, Rutgeerts P, Enns R, et al. Adalimumab induction therapy for Crohn disease previously treated with infliximab: a randomized trial. *Annals of internal medicine*. 2007;146(12):829-38.
43. Sandborn WJ, van Assche G, Reinisch W, et al. Adalimumab induces and maintains clinical remission in patients with moderate-to-severe ulcerative colitis. *Gastroenterology*. 2012;142(2):257-65.e1-3. Epub 2011/11/09.
44. Awni W, Eckert D, Sharma S, et al. P412 Pharmacokinetics of adalimumab in adult patients with moderately to severely active ulcerative colitis. *Journal of Crohn's and Colitis*. 2013;7(Supplement\_1):S175-S.
45. Sandborn WJ, Colombel JF, D'Haens G, et al. One-year maintenance outcomes among patients with moderately-to-severely active ulcerative colitis who responded to induction therapy with adalimumab: subgroup analyses from ULTRA 2. *Alimentary pharmacology & therapeutics*. 2013;37(2):204-13. Epub 2012/11/24.
46. Suzuki Y, Motoya S, Hanai H, et al. Efficacy and safety of adalimumab in Japanese patients with moderately to severely active ulcerative colitis. *Journal of gastroenterology*. 2014;49(2):283-94. Epub 2013/12/24.
47. Suzuki Y, Motoya S, Hanai H, et al. Four-year maintenance treatment with adalimumab in Japanese patients with moderately to severely active ulcerative colitis.[Erratum appears in *J Gastroenterol*. 2017 Apr 12;::; PMID: 28405767]. *Journal of gastroenterology*. 2017;20:20.
48. Watanabe M, Hibi T, Lomax KG, et al. Adalimumab for the induction and maintenance of clinical remission in Japanese patients with Crohn's disease. *Journal of Crohn's & colitis*. 2012;6(2):160-73. Epub 2012/02/14.
49. Watanabe M, Hibi T, Mostafa NM, et al. Long-term safety and efficacy of adalimumab in Japanese patients with moderate to severe Crohn's disease. *Journal of Crohn's & colitis*. 2014;8(11):1407-16.
50. Wright EK, Kamm MA, De Cruz P, et al. Anti-TNF therapeutic drug monitoring in postoperative Crohn's disease. *Journal of Crohn's and Colitis*. 2018;12(6):653-61.
51. Wu KC, Ran ZH, Gao X, et al. Adalimumab induction and maintenance therapy achieve clinical remission and response in Chinese patients with Crohn's disease. *Intestinal research*. 2016;14(2):152-63. Epub 2016/05/14.
52. Roblin X, Williet N, Boschetti G, et al. Addition of azathioprine to the switch of anti-TNF in patients with IBD in clinical relapse with undetectable anti-TNF trough levels and antidrug antibodies: a prospective randomised trial. *Gut*. 2020;24:24.
53. Hibi T, Imai Y, Senoo A, et al. Efficacy and safety of golimumab 52-week maintenance therapy in Japanese patients with moderate to severely active ulcerative colitis: a phase 3, double-blind, randomized, placebo-controlled study-(PURSUIT-J study). *Journal of gastroenterology*. 2017;52(10):1101-11. Epub 2017/03/23.
54. Rutgeerts P, Feagan BG, Marano CW, et al. Randomised clinical trial: a placebo-controlled study of intravenous golimumab induction therapy for ulcerative colitis. *Alimentary pharmacology & therapeutics*. 2015;42(5):504-14. Epub 2015/06/30.
55. Sandborn WJ, Feagan BG, Marano C, et al. Subcutaneous golimumab induces clinical response and remission in patients with moderate-to-severe ulcerative colitis. *Gastroenterology*. 2014;146(1):85-95; quiz e14-5. Epub 2013/06/06.
56. Sandborn WJ, Feagan BG, Marano C, et al. Subcutaneous golimumab maintains clinical response in patients with moderate-to-severe ulcerative colitis. *Gastroenterology*. 2014;146(1):96-109.e1. Epub 2013/06/19.

57. Adedokun O, Xu Z, Marano C, et al. Effects of immunomodulators on the pharmacokinetics and efficacy of golimumab in patients with moderately to severely active ulcerative colitis: Results from phase 2/3 pursuit-SC induction and maintenance studies. *American Journal of Gastroenterology*. 2013;108:S517.
58. Adedokun OJ, Xu Z, Marano CW, et al. Pharmacokinetics and exposure-response relationship of golimumab in patients with moderately to severely active ulcerative colitis: Results from phase 2/3 induction and maintenance studies. *Gastroenterology*. 2013;1):S228-S9.
59. Adedokun OJ, Xu Z, Marano CW, et al. Pharmacokinetics and Exposure-response Relationship of Golimumab in Patients with Moderately-to-Severely Active Ulcerative Colitis: Results from Phase 2/3 PURSUIT Induction and Maintenance Studies. *Journal of Crohn's & colitis*. 2017;11(1):35-46. Epub 2016/07/22.
60. Sandborn WJ, Rutgeerts P, Zhang H, et al. P446 Characterization of ulcerative colitis patients in the Golimumab PURSUIT-Maintenance study: post-hoc analyses of patients who maintained and did not maintain clinical response through week 54. *Journal of Crohn's and Colitis*. 2017;11(suppl\_1):S304-S5.
61. Reinisch W, Gibson PR, Sandborn WJ, et al. Long-Term Benefit of Golimumab for Patients with Moderately to Severely Active Ulcerative Colitis: Results from the PURSUIT-Maintenance Extension. *Journal of Crohn's and Colitis*. 2018;12(9):1053-66.
62. Adedokun OJ, Gunn GR, Leu JH, et al. Immunogenicity of Golimumab and its Clinical Relevance in Patients With Ulcerative Colitis. *Inflammatory bowel diseases*. 2019;25(9):1532-40. Epub 2019/02/13.
63. Sandborn WJ, Feagan BG, Stoinov S, et al. Certolizumab pegol for the treatment of Crohn's disease. *N Engl J Med*. 2007;357(3):228-38.
64. Sandborn W, Khanna R, Dubinsky M, et al. The effect of anti-drug antibodies on adverse events profile in patients with crohn's disease treated with certolizumab pegol: Results of an integrated safety analysis from clinical trials. *Gastroenterology*. 2015;1):S231-S2.
65. Sandborn WJ, Schreiber S, Hanauer SB, et al. Reinduction with certolizumab pegol in patients with relapsed Crohn's disease: results from the PRECiSE 4 Study. *Clinical gastroenterology and hepatology : the official clinical practice journal of the American Gastroenterological Association*. 2010;8(8):696-702 e1.
66. Sandborn W, Dubinsky M, Kosutic G, et al. Incidence of anti-drug antibodies in crohn's disease patients during 5 years of certolizumab pegol therapy. *Inflammatory bowel diseases*. 2016;22:S41.
67. Sandborn WJ, Schreiber S, Feagan BG, et al. Certolizumab pegol for active Crohn's disease: a placebo-controlled, randomized trial. *Clinical gastroenterology and hepatology : the official clinical practice journal of the American Gastroenterological Association*. 2011;9(8):670-8.e3. Epub 2011/06/07.
68. Sandborn WJ, Wolf DC, Kosutic G, et al. Effects of Transient and Persistent Anti-drug Antibodies to Certolizumab Pegol: Longitudinal Data from a 7-Year Study in Crohn's Disease. *Inflammatory bowel diseases*. 2017;23(7):1047-56. Epub 2017/04/15.
69. Lichtenstein GR, Thomsen OO, Schreiber S, et al. Continuous therapy with certolizumab pegol maintains remission of patients with Crohn's disease for up to 18 months. *Clinical Gastroenterology & Hepatology*. 2010;8(7):600-9.
70. Schreiber S, Rutgeerts P, Fedorak RN, et al. A randomized, placebo-controlled trial of certolizumab pegol (CDP870) for treatment of Crohn's disease. *Gastroenterology*. 2005;129(3):807-18. Epub 2005/09/07.
71. Schreiber S, Khaliq-Kareemi M, Lawrance IC, et al. Maintenance therapy with certolizumab pegol for Crohn's disease. *N Engl J Med*. 2007;357(3):239-50.
72. Feagan BG, Greenberg GR, Wild G, et al. Treatment of ulcerative colitis with a humanized antibody to the alpha4beta7 integrin. *N Engl J Med*. 2005;352(24):2499-507. Epub 2005/06/17.
73. Feagan BG, Greenberg GR, Wild G, et al. Treatment of active Crohn's disease with MLN0002, a humanized antibody to the alpha4beta7 integrin. *Clinical gastroenterology and hepatology : the official clinical practice journal of the American Gastroenterological Association*. 2008;6(12):1370-7. Epub 2008/10/03.
74. Feagan BG, Rutgeerts P, Sands BE, et al. Vedolizumab as induction and maintenance therapy for ulcerative colitis. *N Engl J Med*. 2013;369(8):699-710. Epub 2013/08/24.
75. Rosario M, Dirks NL, Gastonguay MR, et al. Population pharmacokinetics-pharmacodynamics of vedolizumab in patients with ulcerative colitis and Crohn's disease.[Erratum appears in *Aliment Pharmacol Ther*. 2015 Nov;42(9):1135; PMID: 26427757]. *Alimentary pharmacology & therapeutics*. 2015;42(2):188-202.



76. Feagan B, Siegel CA, Melmed G, et al. Efficacy of vedolizumab maintenance therapy with and without continued immunosuppressant use in GEMINI 1 and GEMINI 2. *American Journal of Gastroenterology*. 2015;110:S791.
77. Feagan BG, Rubin DT, Danese S, et al. Efficacy of Vedolizumab Induction and Maintenance Therapy in Patients With Ulcerative Colitis, Regardless of Prior Exposure to Tumor Necrosis Factor Antagonists. *Clinical Gastroenterology & Hepatology*. 2017;15(2):229-39.e5.
78. Loftus EV, Colombel JF, Feagan BG, et al. Long-term efficacy of vedolizumab for ulcerative colitis. *Journal of Crohn's and Colitis*. 2017;11(4):400-11.
79. Wyant T, Lirio RA, Yang L, et al. Long-Term Immunogenicity of Intravenous Vedolizumab in Ulcerative Colitis and Crohn's Disease (Gemini Program). *Gastroenterology*. 2019;156 (6 S1):S-1107.
80. Motoya S, Watanabe K, Ogata H, et al. Vedolizumab in Japanese patients with ulcerative colitis: a Phase 3, randomized, double-blind, placebo-controlled study. *PloS one*. 2019;14(2):e0212989.
81. Parikh A, Leach T, Wyant T, et al. Vedolizumab for the treatment of active ulcerative colitis: a randomized controlled phase 2 dose-ranging study. *Inflammatory bowel diseases*. 2012;18(8):1470-9. Epub 2011/12/08.
82. Parikh A, Fox I, Leach T, et al. Long-term clinical experience with vedolizumab in patients with inflammatory bowel disease. *Inflammatory bowel diseases*. 2013;19(8):1691-9.
83. Sandborn WJ, Feagan BG, Rutgeerts P, et al. Vedolizumab as induction and maintenance therapy for Crohn's disease. *N Engl J Med*. 2013;369(8):711-21. Epub 2013/08/24.
84. Vermeire S, Loftus EV, Colombel JF, et al. Long-term Efficacy of Vedolizumab for Crohn's Disease. *Journal of Crohn's & colitis*. 2017;11(4):412-24.
85. Sandborn WJ, Baert F, Danese S, et al. Efficacy and Safety of Vedolizumab Subcutaneous Formulation in a Randomized Trial of Patients With Ulcerative Colitis. *Gastroenterology*. 2020;158(3):562-72.e12.
86. Sandborn WJ, Baert F, Danese S, et al. Efficacy and safety of vedolizumab subcutaneous formulation for ulcerative colitis: Results of the visible trial. *Gut*. 2019;68 (Supplement 2):A60.
87. Sands BE, Feagan BG, Rutgeerts P, et al. Effects of vedolizumab induction therapy for patients with Crohn's disease in whom tumor necrosis factor antagonist treatment had failed. *Gastroenterology*. 2014;147(3):618-27 e3. Epub 2014/05/27.
88. Watanabe K, Motoya S, Ogata H, et al. Effects of vedolizumab in Japanese patients with Crohn's disease: a prospective, multicenter, randomized, placebo-controlled Phase 3 trial with exploratory analyses. *Journal of gastroenterology*. 2020;55(3):291-306.
89. Ghosh S, Goldin E, Gordon FH, et al. Natalizumab for active Crohn's disease. *N Engl J Med*. 2003;348(1):24-32.
90. Gordon FH, Lai CW, Hamilton MI, et al. A randomized placebo-controlled trial of a humanized monoclonal antibody to alpha4 integrin in active Crohn's disease. *Gastroenterology*. 2001;121(2):268-74. Epub 2001/08/07.
91. Gordon FH, Hamilton MI, Donoghue S, et al. A pilot study of treatment of active ulcerative colitis with natalizumab, a humanized monoclonal antibody to alpha-4 integrin. *Alimentary pharmacology & therapeutics*. 2002;16(4):699-705. Epub 2002/04/04.
92. Sandborn WJ, Colombel JF, Enns R, et al. Natalizumab induction and maintenance therapy for Crohn's disease. *N Engl J Med*. 2005;353(18):1912-25. Epub 2005/11/04.
93. Targan SR, Feagan BG, Fedorak RN, et al. Natalizumab for the treatment of active Crohn's disease: results of the ENCORE Trial. *Gastroenterology*. 2007;132(5):1672-83. Epub 2007/05/09.
94. Sands BE, Kozarek R, Spainhour J, et al. Safety and tolerability of concurrent natalizumab treatment for patients with Crohn's disease not in remission while receiving infliximab. *Inflammatory Bowel Disease*. 2007;13:2-11.
95. Sands BE, Sandborn WJ, Panaccione R, et al. Ustekinumab as induction and maintenance therapy for ulcerative colitis. *New England Journal of Medicine*. 2019;381(13):1201-14.
96. Adedokun OJ, Xu Z, Marano C, et al. Ustekinumab Pharmacokinetics and Exposure Response in a Phase 3 Randomized Trial of Patients With Ulcerative Colitis: Ustekinumab PK and exposure-response in UC. *Clinical Gastroenterology & Hepatology*. 2019;06:06.
97. Adedokun OJ, Xu Z, Marano C, et al. Pharmacokinetics and exposure-response relationships of ustekinumab in patients with ulcerative colitis: Results from the UNIFI induction and maintenance studies. *American Journal of Gastroenterology*. 2019;114 (Supplement):S481-S2.

98. Feagan BG, Sandborn WJ, Gasink C, et al. Ustekinumab as Induction and Maintenance Therapy for Crohn's Disease. *New England Journal of Medicine*. 2016;375(20):1946-60.
99. Hibi T, Imai Y, Murata Y, et al. Efficacy and safety of ustekinumab in Japanese patients with moderately to severely active Crohn's disease: a subpopulation analysis of phase 3 induction and maintenance studies. *Intestinal research*. 2017;15(4):475-86.
100. Sandborn W, Gasink C, Blank M, et al. A multicenter, double-blind, placebo-controlled phase 3 study of ustekinumab, a human IL-1 $\beta$  p40 mab, in moderate-severe Crohn's disease refractory to anti-TNF $\alpha$ : UNIFI-1. *Inflammatory bowel diseases*. 2016;22:S1.
101. Sandborn WJ, Rutgeerts P, Gasink C, et al. Long-term efficacy and safety of ustekinumab for Crohn's disease through the second year of therapy. *Alimentary pharmacology & therapeutics*. 2018;48(1):65-77.
102. Sandborn WJ, Sands BE, Nussbaum J, et al. Immunogenicity of Ustekinumab in Patients with Crohn's Disease: Results from the Im-Uniti Study. *Gastroenterology*. 2019;156 (6 S1):S-1097.
103. Ghosh S, Kramer BC, Gasink C, et al. Long-term efficacy of ustekinumab with and without concomitant immunosuppressants for Crohn's disease: Results from IM-UNITI long-term extension through 2 years. *Journal of Crohn's and Colitis*. 2019;13 (Supplement 1):S459-S60.
104. Hanauer SB, Sandborn WJ, Feagan BG, et al. IM-UNITI: Three-year Efficacy, Safety, and Immunogenicity of Ustekinumab Treatment of Crohn's Disease. *Journal of Crohn's & colitis*. 2020;14(1):23-32.
105. Sandborn WJ, Feagan BG, Fedorak RN, et al. A randomized trial of Ustekinumab, a human interleukin-12/23 monoclonal antibody, in patients with moderate-to-severe Crohn's disease. *Gastroenterology*. 2008;135(4):1130-41.
106. Sandborn WJ, Gasink C, Gao LL, et al. Ustekinumab induction and maintenance therapy in refractory Crohn's disease. *N Engl J Med*. 2012;367(16):1519-28. Epub 2012/10/19.
107. Rutgeerts PJ, Fedorak RN, Hommes DW, et al. A randomised phase I study of etrolizumab (rhuMAb beta7) in moderate to severe ulcerative colitis. *Gut*. 2013;62(8):1122-30. Epub 2012/06/22.
108. Vermeire S, O'Byrne S, Keir M, et al. Etrolizumab as induction therapy for ulcerative colitis: a randomised, controlled, phase 2 trial. *Lancet*. 2014;384(9940):309-18. Epub 2014/05/13.
109. Sandborn WJ, Abreu MT, D'Haens G, et al. Certolizumab pegol in patients with moderate to severe Crohn's disease and secondary failure to infliximab. *Clinical gastroenterology and hepatology : the official clinical practice journal of the American Gastroenterological Association*. 2010;8(8):688-95.e2. Epub 2010/05/11.
110. Sandborn W, Dubinsky M, Kosutic G, et al. P-101 Incidence of Anti-drug Antibodies in Crohn's Disease Patients During 5 Years of Certolizumab Pegol Therapy. *Inflammatory bowel diseases*. 2016;22(suppl\_1):S41-S.
